# Supplementary material for: Li2ZrO3-Coated Monocrystalline LiAl0.06Mn1.94O4 Particles as Cathode Materials for Lithium-Ion Batteries
Source: MDPI journal article supplement (doi:10.3390/nano11123223), 2021-11-27
Supplement: s1 [file s1]

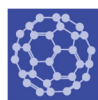

## Supplementary Materials

# Li<sub>2</sub>ZrO<sub>3</sub>-Coated Monocrystalline LiAl<sub>0.06</sub>Mn<sub>1.94</sub>O<sub>4</sub> Particles as Cathode Materials for Lithium-Ion Batteries

Chunliu Li <sup>1,2,†</sup>, Banglei Zhao <sup>3,†</sup>, Junfeng Yang <sup>1,4,\*</sup>, Linchao Zhang <sup>1,\*</sup>, Qianfeng Fang <sup>1,2</sup> and Xianping Wang <sup>1,\*</sup>

<sup>1</sup> Key Laboratory of Materials Physics, Institute of Solid State Physics, HFIPS, Chinese Academy of Sciences, Hefei 230031, China; lcliu@southmn.com (C.L.); qffang@issp.ac.cn (Q.F.)

<sup>2</sup> Science Island Branch, Graduate School of University of Science and Technology of China, Hefei 230026, China

<sup>3</sup> School of Management Science and Engineering, Anhui University of Finance and Economics, Bengbu 233030, China; zbl1234@mail.ustc.edu.cn

<sup>4</sup> Lu'an Branch, Anhui Institute of Innovation for Industrial Technology, Lu'an 237100, China

\* Correspondence: jfyang@issp.ac.cn (J.Y.); lc Zhang@issp.ac.cn (L.Z.); xpwang@issp.ac.cn (X.W.)

† These authors contributed equally to this work.

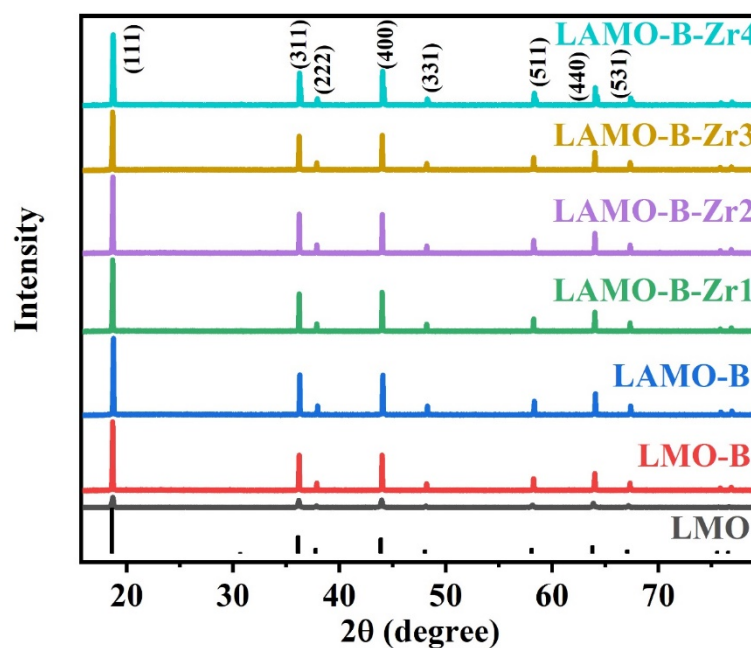

Figure S1. The XRD patterns of the LiMn<sub>2</sub>O<sub>4</sub> samples.

Table S1. The full width at half maximum (FWHM) of the LMO and LMO-B samples.

|       | 2θ    | (hkl) | FWHM  |
|-------|-------|-------|-------|
| LMO   | 18.69 | 111   | 0.188 |
|       | 36.17 | 311   | 0.152 |
|       | 37.84 | 222   | 0.155 |
|       | 43.96 | 400   | 0.163 |
|       | 48.12 | 331   | 0.151 |
|       | 58.16 | 511   | 0.176 |
|       | 2θ    | (hkl) | FWHM  |
| LMO-B | 18.67 | 111   | 0.071 |
|       | 36.20 | 311   | 0.061 |
|       | 37.87 | 222   | 0.053 |
|       | 44.01 | 400   | 0.064 |
|       | 48.20 | 331   | 0.066 |
|       | 58.26 | 511   | 0.073 |

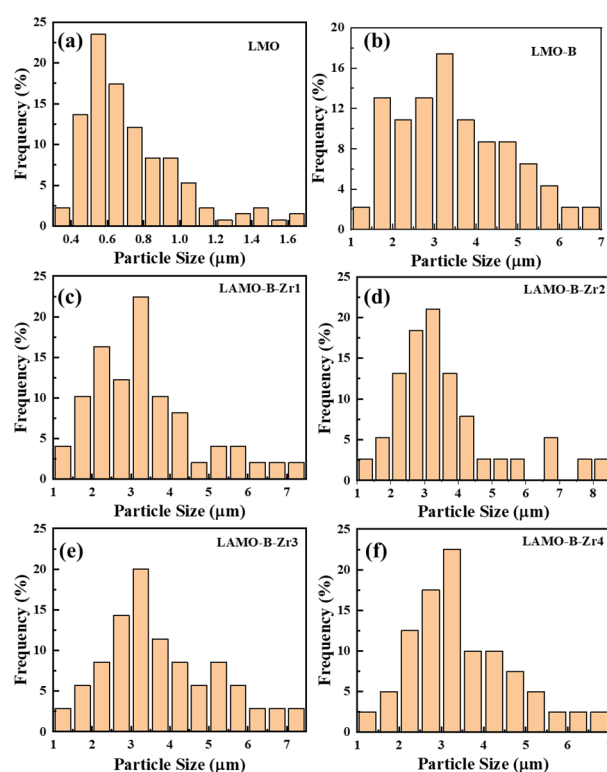

**Figure S2.** The particle size distribution of the (a) LMO; (b) LMO-B; (c) LAMO-B-Zr1; (d) LAMO-B-Zr2; (e) LAMO-B-Zr3; (f) LAMO-B-Zr4.

**Table S2.** Comparison of electrochemical performance of different  $\text{LiMn}_2\text{O}_4$  electrode materials.

| Electrode material                                                           | Discharge Capacity (mAh/g)            | Capacity retention                                                       | Reference |
|------------------------------------------------------------------------------|---------------------------------------|--------------------------------------------------------------------------|-----------|
| LAMO-B-Zr2                                                                   | 118.88@0.5C & 55 °C<br>104@5C & 25 °C | 94% after 200 cycles@0.2C & 25 °C<br>87.8% after 100 cycles@0.2C & 55 °C | This work |
| $\text{LiAl}_{0.1}\text{Mn}_{1.9}\text{O}_4$<br>Single-Crystalline Nanotubes | 110@0.1C & 55 °C<br>90@5C & 25 °C     | 80% after 200 cycles@5C & 55 °C                                          | [1]       |
| $\text{LiAl}_{0.1}\text{Mn}_{1.9}\text{O}_4$                                 | 90@2C & 55 °C<br>106@5C & 25 °C       | 88.7% after 1000 cycles@2C & 25 °C<br>86.1% after 500 cycles@2C & 55 °C  | [2]       |
| Single-crystalline $\text{LiMn}_2\text{O}_4$ nano-tubes                      | 80@5C & 25 °C                         | 70% after 1500 cycles @5C & 25 °C                                        | [3]       |

## References

- Ding, Y.L.; Xie, J.; Cao, G.S.; Zhu, T.J.; Yu, H.M.; Zhao, X.B. Enhanced elevated-temperature performance of Al-doped single-crystalline  $\text{LiMn}_2\text{O}_4$  nanotubes as cathodes for lithium ion batteries. *J. Phys. Chem. C* **2011**, *115*, 9821–9825.
- Fu, Y.; Jiang, H.; Hu, Y.; Dai, Y.; Zhang, L.; Li, C. Synergistic enhancement effect of Al doping and highly active facets of  $\text{LiMn}_2\text{O}_4$  cathode materials for lithium-ion batteries. *Ind. Eng. Chem. Res.* **2015**, *54*, 3800–3805.
- Ding, Y.L.; Xie, J.; Cao, G.S.; Zhu, T.J.; Yu, H.M.; Zhao, X.B. Single-crystalline  $\text{LiMn}_2\text{O}_4$  nanotubes synthesized via template-engaged reaction as cathodes for high-power lithium ion batteries. *Adv. Funct. Mater.* **2011**, *21*, 348–355.
